# Supplementary material for: MIL-101 promotes the efficient aerobic oxidative desulfurization of dibenzothiophenes
Source: Royal Society of Chemistry journal article supplement (doi:10.1039/c5gc00862j), 2015-08-12
Supplement: c5gc00862j1.pdf [file c5gc00862j1.pdf]

## ***Supplementary Information***

# **MIL-101 promotes the efficient aerobic oxidative desulfuration of dibenzothiophenes**

Adrián Gómez-Aparicio,<sup>a</sup> Andrea Santiago-Portillo,<sup>a</sup> Sergio Navalón,<sup>a</sup> Patricia Concepción,<sup>b</sup> Mercedes Alvaro<sup>a</sup> and Hermenegildo Garcia<sup>b,c,\*</sup>

<sup>a</sup> Departamento de Química and Instituto de Tecnología Química CSIC-UPV,  
Universidad Politécnica de Valencia, Consejo Superior de Investigaciones Científicas,  
Av. de los Naranjos s/n, 46022 Valencia, Spain

<sup>§</sup> Center of Excellence for Advanced Materials Research, King Abdulaziz University,  
Jeddah, Saudi Arabia

\* Corresponding author: hgarcia@qim.upv.es

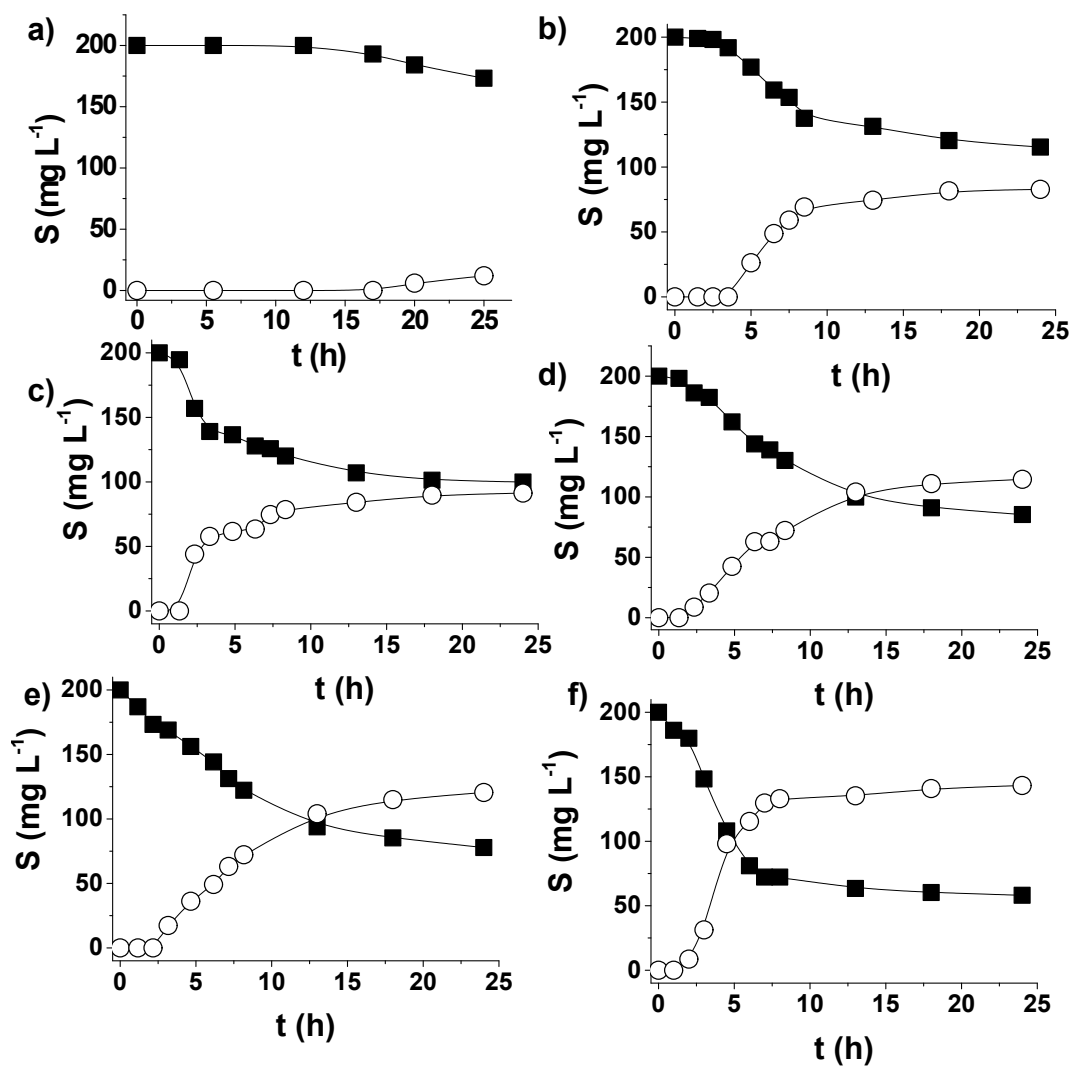

**Figure S1** Blank control experiments for the aerobic oxidation of DBT (■) to DBT-Sulfone (Δ) in the absence of catalyst at different reaction temperatures. Legend: a) 120 °C, b) 140 °C, c) 150 °C, d) 160 °C, e) 170 °C and f) 180 °C. Reaction conditions: DBT (1,150 mg L<sup>-1</sup>), n-dodecane (10 mL), O<sub>2</sub> (1 atm), 120 °C.

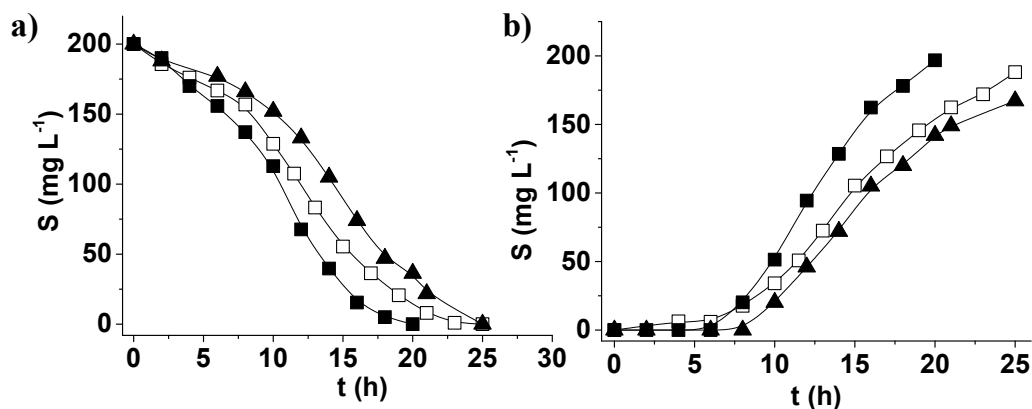

**Figure S2** Influence of solvent in the aerobic oxidation of DBT (a) to DBT-S (b) using MIL-101(Cr) as catalyst. Reaction conditions: Catalyst (500 mg L<sup>-1</sup>), DBT (1,150 mg L<sup>-1</sup>), solvent (10 mL), O<sub>2</sub> (1 atm), 120 °C. Legend: *n*-decane (■), *n*-dodecane (□), *n*-tetradecane (▲).

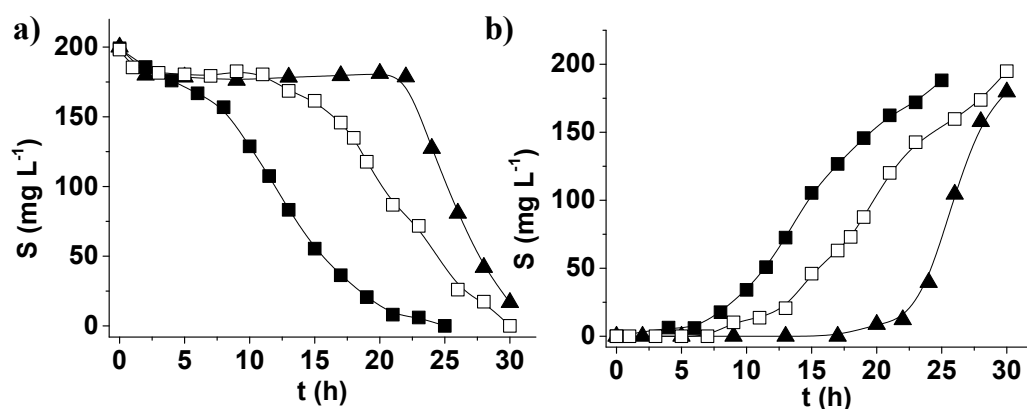

**Figure S3** (a) Influence of oxygen partial pressure in the aerobic oxidation of DBT to DBT-Sulfone; (b) Relationship between the initial reaction rate of DBT degradation and the partial oxygen pressure. Reaction conditions: Catalyst (500 mg L<sup>-1</sup>), DBT (1,150 mg L<sup>-1</sup>), dodecane (10 mL), reaction atmosphere (1 atm), 120 °C. Legend: O<sub>2</sub> (■), air (□), Ar for 23 h and then O<sub>2</sub> atmosphere (▲).

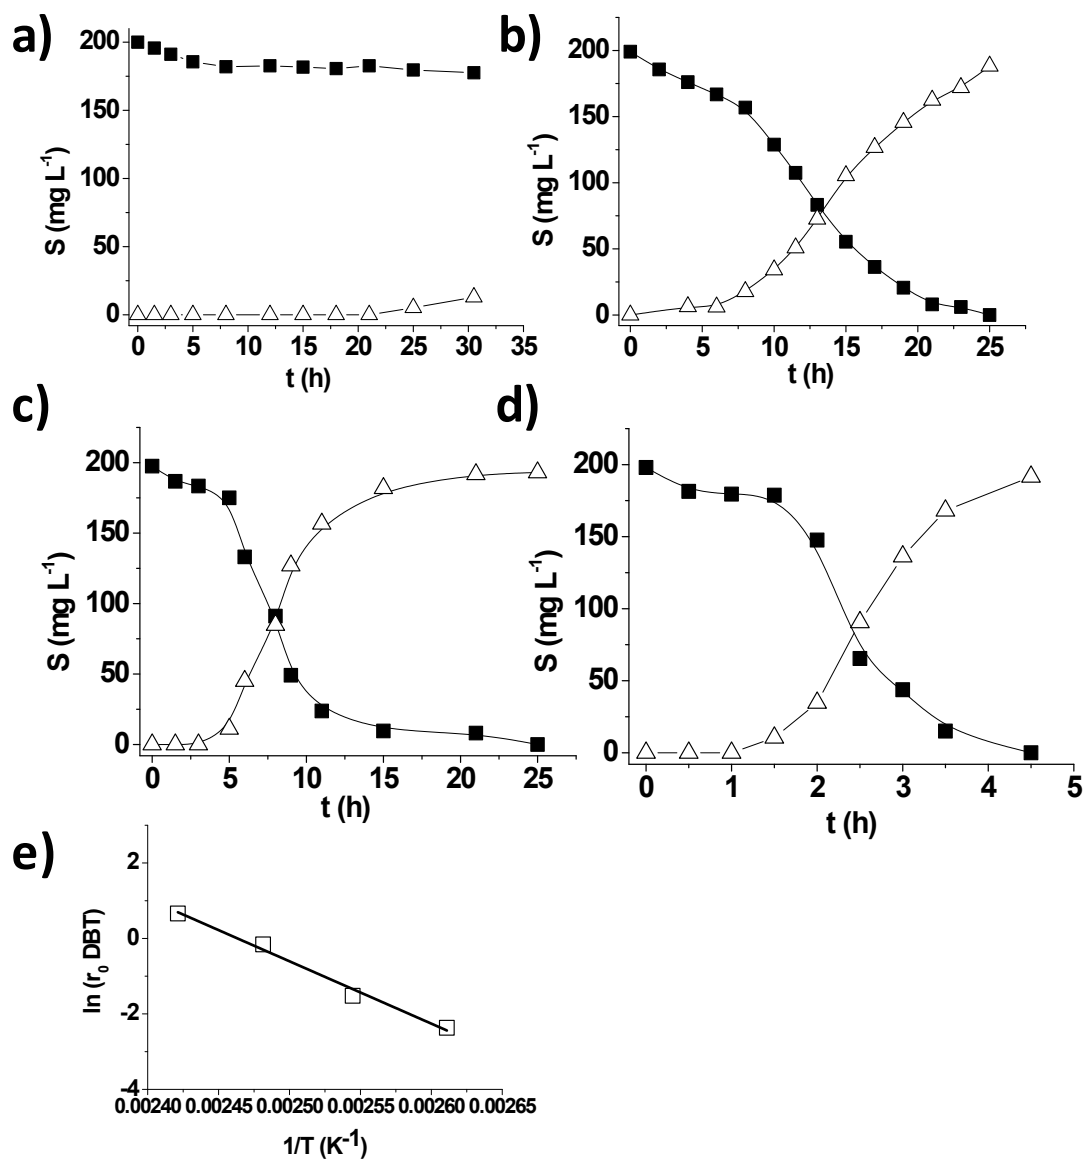

**Figure S4** Influence of the reaction temperature namely 110 °C (a), 120 °C (b), 130 °C (c) or 140 °C (d) and Arrhenius plot (e) in the aerobic oxidation of DBT (■) to DBT-Sulfone (Δ) using MIL-101(Cr) as catalyst. Reaction conditions: Catalyst (500 mg L<sup>-1</sup>), DBT (1,150 mg L<sup>-1</sup>), *n*-dodecane (10 mL), O<sub>2</sub> (1 atm), T (as indicated).

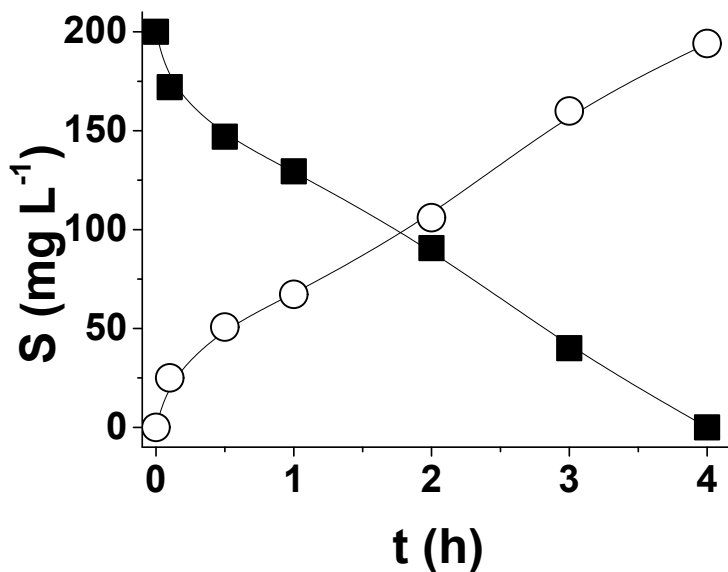

**Figure S5** Aerobic oxidation of DBT (■) to DBT-S (o) using 10 mg of MIL-101(Cr) as catalyst. Reaction conditions: Catalyst (1,000 mg L<sup>-1</sup>), DBT (1,150 mg L<sup>-1</sup>), solvent (10 mL), O<sub>2</sub> (1 atm), 140 °C.

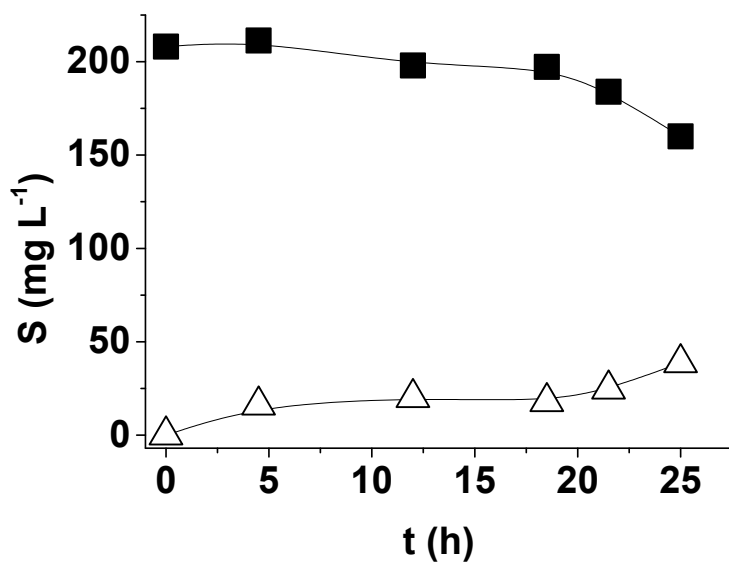

**Figure S6** Blank control experiment for the homogeneous aerobic oxidation of DBT with O<sub>2</sub> in the presence of Cr(III) acetate hydroxide as homogeneous catalyst. Reaction conditions: Chromium(III) acetate hydroxide (0.6 mg L<sup>-1</sup> as Cr<sup>3+</sup>), DBT (1,150 mg L<sup>-1</sup>), *n*-dodecane (10 mL), O<sub>2</sub> (1 atm), 120 °C.

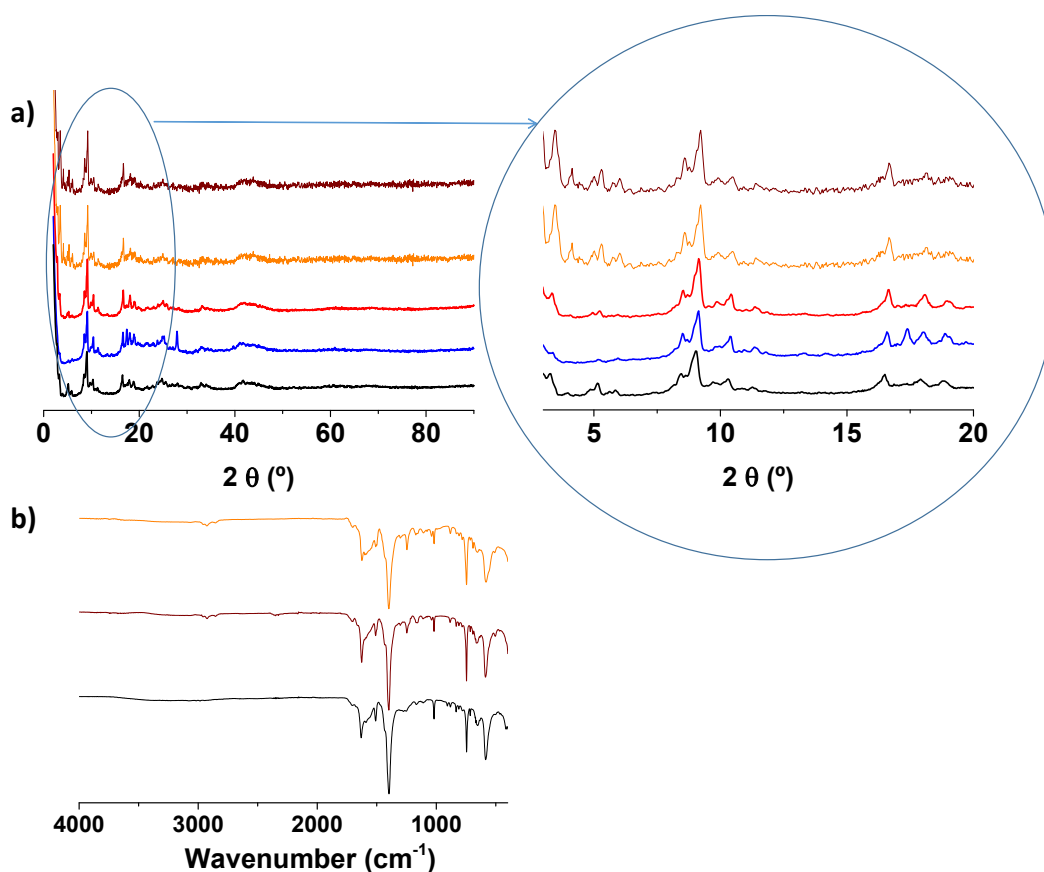

**Figure S7** XRD (a) and ATR-FT-IR of fresh and used MIL-101(Cr) samples. Legend for MIL-101(Cr) samples: fresh (black), used and non-washed (blue), one use (red), three uses (orange) and five uses (brown) and washed MIL-101(Cr). Reaction conditions of the used MIL-101(Cr) sample: Catalyst ( $500 \text{ mg L}^{-1}$ ), DBT ( $1,150 \text{ mg L}^{-1}$ ), *n*-dodecane (100 mL),  $\text{O}_2$  (1 atm), T ( $120 \text{ }^\circ\text{C}$ ).

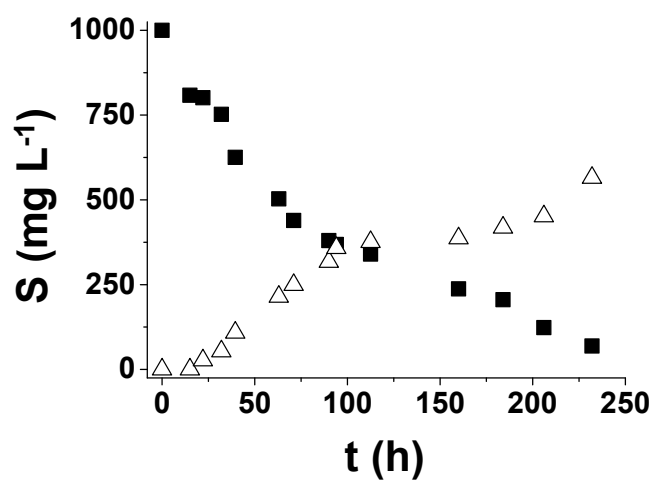

**Figure S8** Productivity test for the aerobic oxidation of DBT (■) to DBT-Sulfone (Δ) using MIL-101(Cr) as catalyst. Reaction conditions: Catalyst (10 mg L<sup>-1</sup>), DBT (5,750 mg L<sup>-1</sup>), *n*-dodecane (10 mL), O<sub>2</sub> (1 atm), 120 °C.

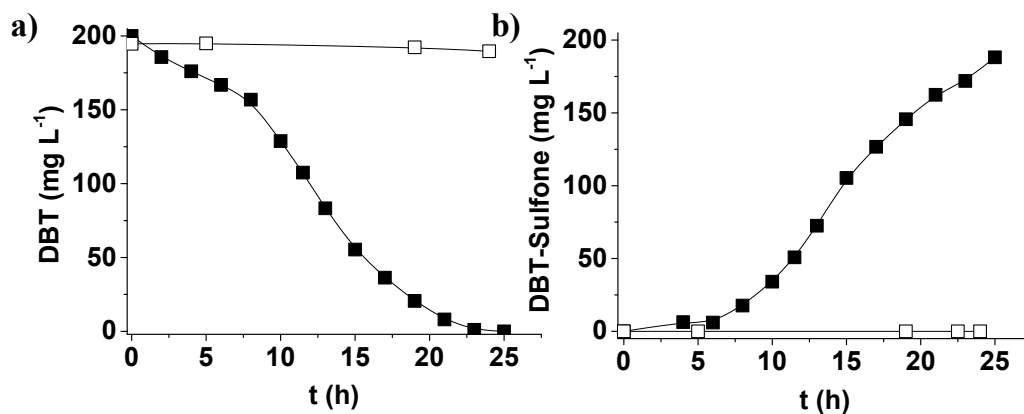

**Figure S9** Aerobic oxidation of DBT (a) to DBT-Sulfone (b) in the absence (■) and in the presence of *p*-benzoquinone (□) as selective  $O_2^{\cdot-}/HOO^{\cdot}$  radical scavenger using MIL-101(Cr) as catalyst. Reaction conditions: Catalyst ( $500 \text{ mg L}^{-1}$ ), DBT ( $1,150 \text{ mg L}^{-1}$ ), *p*-benzoquinone (20 mol % respect to DBT), *n*-dodecane (10 mL),  $O_2$  (1 atm),  $120 \text{ }^\circ\text{C}$ ,

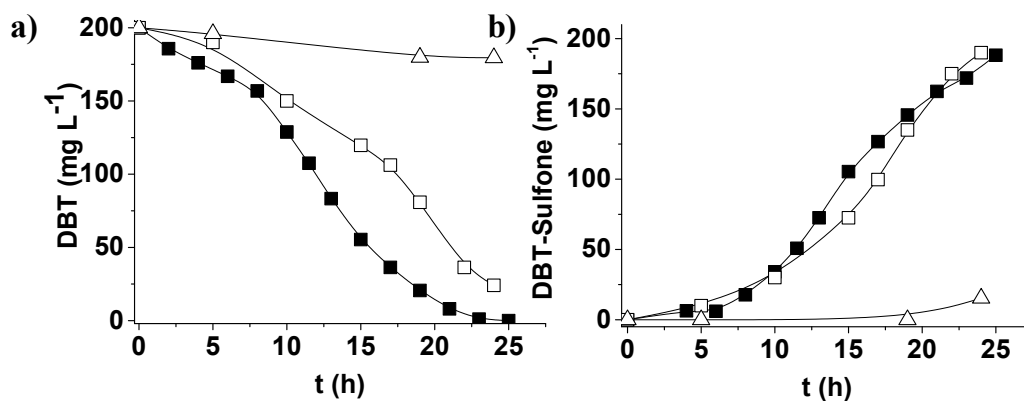

**Figure S10** Aerobic oxidation of DBT (a) to DBT-Sulfone (b) using MIL-101(Cr) as heterogeneous catalyst or using TBHP (□) or benzoyl peroxide ( $\Delta$ ) as homogeneous catalyst. Reaction conditions: MIL-101(Cr) ( $500 \text{ mg L}^{-1}$ ), TBHP or benzoyl peroxide (20 mol % respect to DBT), DBT ( $1,150 \text{ mg L}^{-1}$ ), *n*-dodecane (10 mL),  $O_2$  (1 atm),  $120 \text{ }^\circ\text{C}$ .



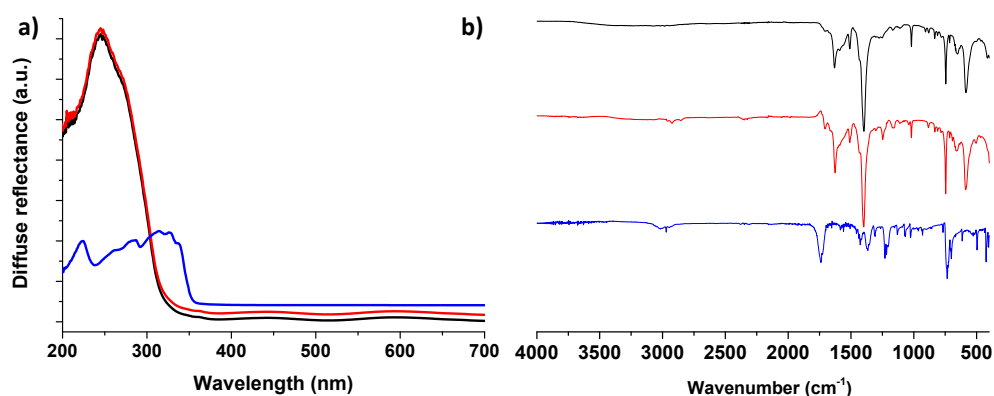

**Figure S11** (a) Diffuse reflectance UV-vis absorption (a) and ATR-FT-IR (b) spectra of MIL-101(Cr) (black line), DBT (blue line) and MIL-101(Cr)+adsorbed DBT (red line). Adsorption conditions: MIL-101(Cr) (25 mg), DBT (1,150 mg L<sup>-1</sup>), *n*-dodecane (50 mL), room temperature, 24 h.

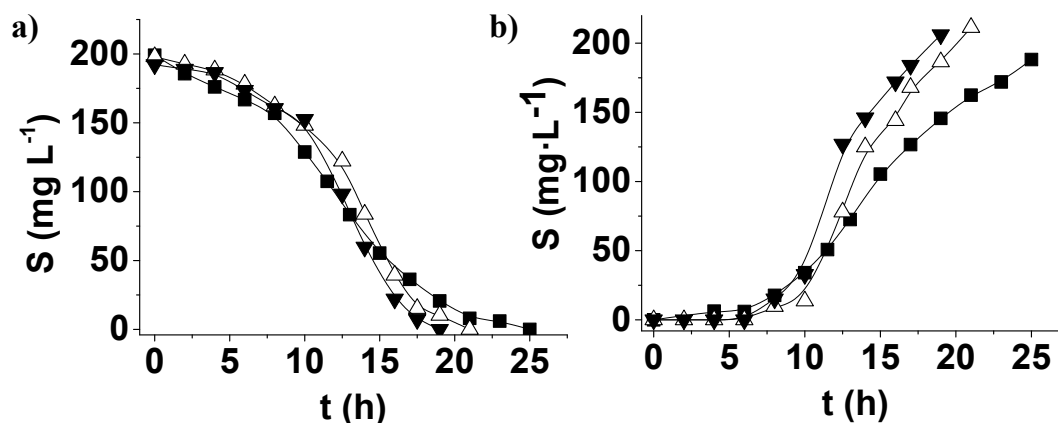

**Figure S12** Aerobic oxidation of DBT, 4-methyl DBT and 4,6-dimethyl DBT to their corresponding sulfones in the presence of MIL-101(Cr) as catalyst. Reaction conditions: Catalyst (500 mg L<sup>-1</sup>), substrate (200 mg L<sup>-1</sup> as S), *n*-dodecane (10 mL), O<sub>2</sub> (1 atm), 120 °C. Legend (a): DBT (■), 4-methylDBT (Δ), 4,6-dimethylDBT (▼); Legend (b): DBT-Sulfone (■), 4-methyl DBT-Sulfone (Δ), 4,6-dimethylDBT Sulfone (▼).

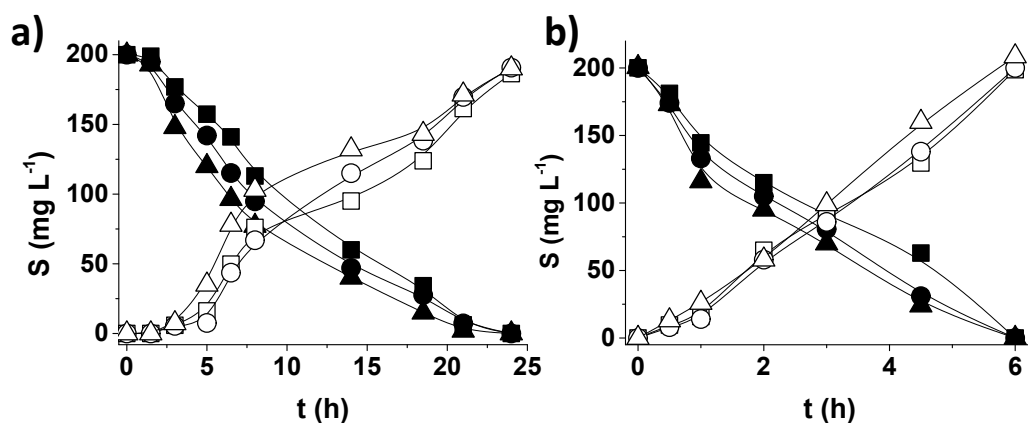

**Figure S13** Aerobic oxidation of DBT, 4-methyl DBT and 4,6-dimethyl DBT in a multicomponent system to their corresponding sulfones at 120 °C (a) or 140 °C (b) in the presence of MIL-101(Cr) as catalyst. Reaction conditions: Catalyst (500 mg L<sup>-1</sup>), substrate (200 mg L<sup>-1</sup> as S each component), *n*-dodecane (10 mL), O<sub>2</sub> (1 atm), T as indicated. Legend (a): DBT (■), 4-methylDBT (●), 4,6-dimethylDBT (▲); Legend (b): DBT-Sulfone (□), 4-methyl DBT-Sulfone (○), 4,6-dimethylDBT Sulfone (Δ).

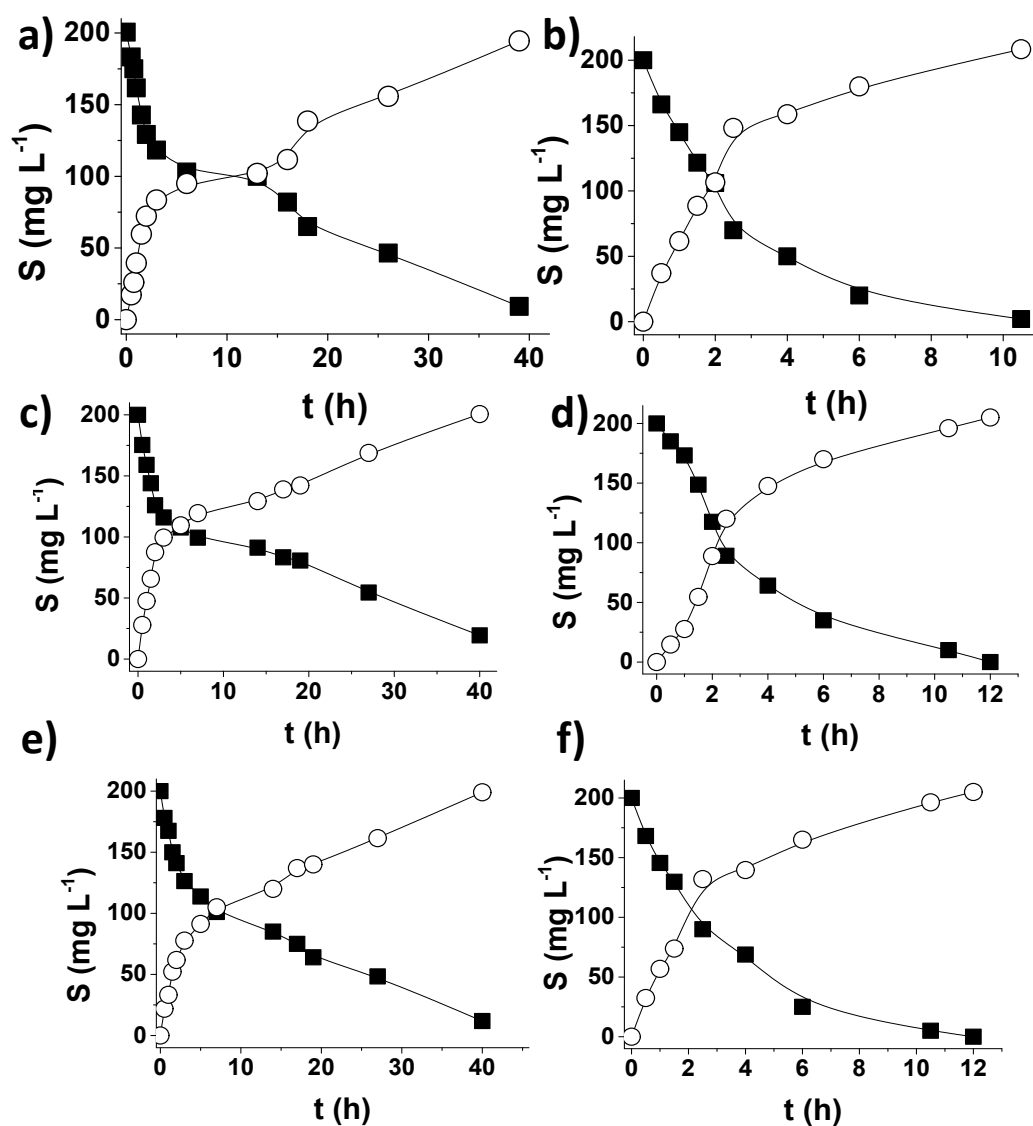

**Figure S14** Aerobic oxidation of DBT (a, b), 4-methyl DBT (c, d) and 4,6-dimethyl DBT (e, f) to their corresponding sulfones at 120 °C (a, c, d) or 140 °C (b, d, f) in the presence of MIL-101(Cr) as catalyst. Reaction conditions: Catalyst (500 mg L<sup>-1</sup>), substrate (200 mg L<sup>-1</sup> as S), commercial diesel (10 mL), O<sub>2</sub> (1 atm), T as indicated.
